# Supplementary material for: Ballroom Dancing Promotes Neural Activity in the Sensorimotor System: A Resting-State fMRI Study
Source: Hindawi journal article supplement (doi:10.1155/2018/2024835), 2018-01-01
Supplement: f1 [file 2024835.f1.pdf]

## Functional Connectivity Results

1. the sphere peak at [-33, -42, 12], radius = 10 mm

TABLE: Brain regions with significantly different functional connectivity values between the dance group and control group.

| Brain regions           | Side | BA | MNI coordinates |     |    | Cluster size | <i>t</i> value |
|-------------------------|------|----|-----------------|-----|----|--------------|----------------|
|                         |      |    | x               | y   | z  |              |                |
| Inferior parietal gyrus | L    | 7  | -21             | -54 | 36 | 72           | -4.84          |
| Middle occipital gyrus  | L    | 7  | -21             | -54 | 36 | 72           | -4.84          |

Notes: BA, Brodmann area; MNI, Montreal Neurological Institute; L, left; R, right.

2. the sphere peak at [-51, -18, -30], radius = 10 mm

TABLE: Brain regions with significantly different functional connectivity values between the dance group and control group.

| Brain regions            | Side | BA | MNI coordinates |     |     | Cluster size | <i>t</i> value |
|--------------------------|------|----|-----------------|-----|-----|--------------|----------------|
|                          |      |    | x               | y   | z   |              |                |
| Superior frontal gyrus   | L    | 6  | -15             | 3   | 75  | 61           | -5.46          |
| Middle occipital gyrus   | L    | 37 | -45             | -51 | -21 | 117          | -5.41          |
| Postcentral gyrus        | R    | 2  | 15              | -39 | 75  | 69           | -5.11          |
| Rolandic operculum gyrus | R    | 42 | 69              | -12 | 15  | 73           | -4.77          |

Notes: BA, Brodmann area; MNI, Montreal Neurological Institute; L, left; R, right.

3. the sphere peak at [45, 27, 15], radius = 10 mm

TABLE: Brain regions with significantly different functional connectivity values between the dance group and control group.

| Brain regions            | Side | BA | MNI coordinates |     |    | Cluster size | <i>t</i> value |
|--------------------------|------|----|-----------------|-----|----|--------------|----------------|
|                          |      |    | x               | y   | z  |              |                |
| Superior parietal gyrus  | L    | 7  | -24             | -54 | 54 | 80           | -6.42          |
| Middle occipital gyrus   | L    | 19 | -39             | -57 | -9 | 977          | -5.88          |
| Fusiform gyrus           | L    | 37 | -39             | -57 | -9 | 977          | -5.88          |
| cerebellum               | L    | 37 | -39             | -57 | -9 | 977          | -5.88          |
| Fusiform gyrus           | R    | 37 | -39             | -57 | -9 | 977          | -5.88          |
| cerebellum               | R    | 37 | -39             | -57 | -9 | 977          | -5.88          |
| Superior occipital gyrus | R    | 19 | 15              | -93 | 27 | 59           | -5.10          |

Notes: BA, Brodmann area; MNI, Montreal Neurological Institute; L, left; R, right.

4. the sphere peak at [36, -69, -6], radius = 10 mm

TABLE: Brain regions with significantly different functional connectivity values between the dance group and control group.

| Brain regions           | Side | BA | MNI coordinates |     |     | Cluster size | <i>t</i> value |
|-------------------------|------|----|-----------------|-----|-----|--------------|----------------|
|                         |      |    | x               | y   | z   |              |                |
| Insula                  | R    | 13 | 18              | -15 | 24  | 86           | -6.23          |
| Lingual gyrus           | R    | 18 | 30              | -99 | -12 | 249          | -5.56          |
| Inferior frontal gyrus  | L    | 47 | -48             | 27  | -9  | 140          | -5.55          |
| Medial frontal gyrus    | L    | 9  | -3              | 48  | 54  | 205          | -5.28          |
| Lingual gyrus           | L    | 18 | -24             | -96 | -15 | 106          | -5.27          |
| Inferior temporal gyrus | L    | 20 | -57             | 0   | -27 | 90           | -5.08          |
| Inferior frontal gyrus  | R    | 47 | 42              | 27  | -6  | 78           | -5.07          |
| Middle temporal gyrus   | R    | 38 | 54              | 12  | -33 | 74           | -4.93          |

Notes: BA, Brodmann area; MNI, Montreal Neurological Institute; L, left; R, right.

5. the sphere peak at [-27, 3, 39], radius = 10 mm

TABLE: Brain regions with significantly different functional connectivity values between the dance group and control group.

| Brain regions          | Side | BA | MNI coordinates |     |     | Cluster size | <i>t</i> value |
|------------------------|------|----|-----------------|-----|-----|--------------|----------------|
|                        |      |    | x               | y   | z   |              |                |
| Superior frontal gyrus | L    | 10 | -6              | 60  | 33  | 521          | -6.76          |
| Medial frontal gyrus   | L    | 10 | -6              | 60  | 33  | 521          | -6.76          |
| Cerebellum             | L    | 19 | -36             | -78 | -21 | 956          | -5.21          |
| Cerebellum             | R    | 19 | -36             | -78 | -21 | 956          | -5.21          |

Notes: BA, Brodmann area; MNI, Montreal Neurological Institute; L, left; R, right.
